# Supplementary material for: Residual C-peptide secretion and hypoglycemia awareness in people with type 1 diabetes
Source: PubMed Central journal article supplement (PMC8444236; doi:10.1136/bmjdrc-2021-002288), 2021-09-15
Supplement: bmjdrc-2021-002288supp001.pdf [file bmjdrc-2021-002288supp001.pdf]

## Supporting information

Table S1. Multivariable association of impaired awareness of hypoglycaemia with clinical parameters, C-peptide dichotomous

|                                           | Full model |             |          | Forward stepwise model |             |          |
|-------------------------------------------|------------|-------------|----------|------------------------|-------------|----------|
|                                           | OR         | 95%CI       | <i>P</i> | OR                     | 95%CI       | <i>P</i> |
| Diabetes duration                         | 1.02       | [0.99-1.04] | 0.253    |                        |             |          |
| Log Age at onset of diabetes, years       | 3.98       | [1.62-9.80] | 0.003    | 3.95                   | [1.75-8.93] | 0.001    |
| BMI kg/m <sup>2</sup>                     | 1.07       | [1.02-1.13] | 0.012    | 1.08                   | [1.02-1.14] | 0.004    |
| Hypertension                              | 1.19       | [0.62-2.28] | 0.609    |                        |             |          |
| Microvascular complications               | 1.81       | [1.00-3.30] | 0.051    | 2.26                   | [1.32-3.87] | 0.003    |
| Macrovascular complications               | 1.49       | [0.54-4.08] | 0.436    |                        |             |          |
| C-peptide, dichotomous                    | 0.54       | [0.28-1.06] | 0.073    | 0.51                   | [0.26-0.98] | 0.042    |
| eGFR (CKD-EPI), ml/min/1.73m <sup>2</sup> | 1.00       | [0.99-1.02] | 0.945    |                        |             |          |
| Beta-blocker use                          | 0.76       | [0.26-2.21] | 0.614    |                        |             |          |
