# Supplementary material for: Residual C-peptide secretion and hypoglycemia awareness in people with type 1 diabetes
Source: PubMed Central journal article supplement (PMC8444236; doi:10.1136/bmjdrc-2021-002288), 2021-09-15
Supplement: bmjdrc-2021-002288supp002.pdf [file bmjdrc-2021-002288supp002.pdf]

## Supporting information

Table S2. Multivariable association of impaired awareness of hypoglycaemia with clinical parameters, C-peptide categorical

|                                           | Full model |             |          | Forward stepwise model |             |          |
|-------------------------------------------|------------|-------------|----------|------------------------|-------------|----------|
|                                           | OR         | 95%CI       | <i>P</i> | OR                     | 95%CI       | <i>P</i> |
| Diabetes duration                         | 1.01       | [0.99-1.04] | 0.266    |                        |             |          |
| Log Age at onset of diabetes, years       | 4.00       | [1.63-9.86] | 0.003    | 3.21                   | [1.48-6.96] | 0.003    |
| BMI kg/m <sup>2</sup>                     | 1.07       | [1.02-1.13] | 0.011    | 1.08                   | [1.02-1.14] | 0.004    |
| Hypertension                              | 1.19       | [0.62-2.28] | 0.604    |                        |             |          |
| Microvascular complications               | 1.82       | [1.00-3.31] | 0.050    | 2.35                   | [1.38-4.01] | 0.002    |
| Macrovascular complications               | 1.51       | [0.55-4.15] | 0.423    |                        |             |          |
| C-peptide 3.8-20 pmol/l                   | 0.63       | [0.26-1.51] | 0.300    |                        |             |          |
| C-peptide > 20 pmol/l                     | 0.47       | [0.20-1.15] | 0.099    |                        |             |          |
| eGFR (CKD-EPI), ml/min/1.73m <sup>2</sup> | 1.00       | [0.99-1.02] | 0.959    |                        |             |          |
| Beta-blocker use                          | 0.75       | [0.26-2.18] | 0.595    |                        |             |          |
