# Supplementary material for: Residual C-peptide secretion and hypoglycemia awareness in people with type 1 diabetes
Source: PubMed Central journal article supplement (PMC8444236; doi:10.1136/bmjdrc-2021-002288), 2021-09-15
Supplement: bmjdrc-2021-002288supp003.pdf [file bmjdrc-2021-002288supp003.pdf]

## Supporting information

Table S3. Multivariable analysis applied to our dataset according to the methodology of Holstein et al.<sup>22</sup>

|                                        | OR   | 95%CI       | <i>P</i> |
|----------------------------------------|------|-------------|----------|
| C-peptide (negative vs positive)       | 2.49 | [1.08-5.71] | 0.032    |
| HbA1c (%)                              | 1.20 | [0.90-1.61] | 0.218    |
| Diabetes duration (>20 yrs vs <10 yrs) | 1.07 | [0.40-2.85] | 0.888    |
| Age (yrs)                              | 1.02 | [1.00-1.04] | 0.043    |
